# Supplementary material for: Beach-face slope dataset for Australia
Source: Copernicus journal article supplement (doi:10.5194/essd-14-1345-2022), 2022-03-25
Supplement: Supplementary file 1 [file essd-14-1345-2022-supplement.pdf]

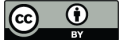

*Supplement of*

## **Beach-face slope dataset for Australia**

**Kilian Vos et al.**

*Correspondence to:* Kilian Vos ([k.vos@unsw.edu.au](mailto:k.vos@unsw.edu.au))

The copyright of individual parts of the supplement might differ from the article licence.

The Supplementary Information contains 4 figures:

- Figure S1: Mean Spring Tidal Range and Significant Wave Height around Australia
- Figure S2: Primary and Secondary Sediment Compartments
- Figure S3: Beach-face slope distributions in the Primary Sediment Compartments
- Figure S4: Beach-face slope distributions in the Secondary Sediment Compartments

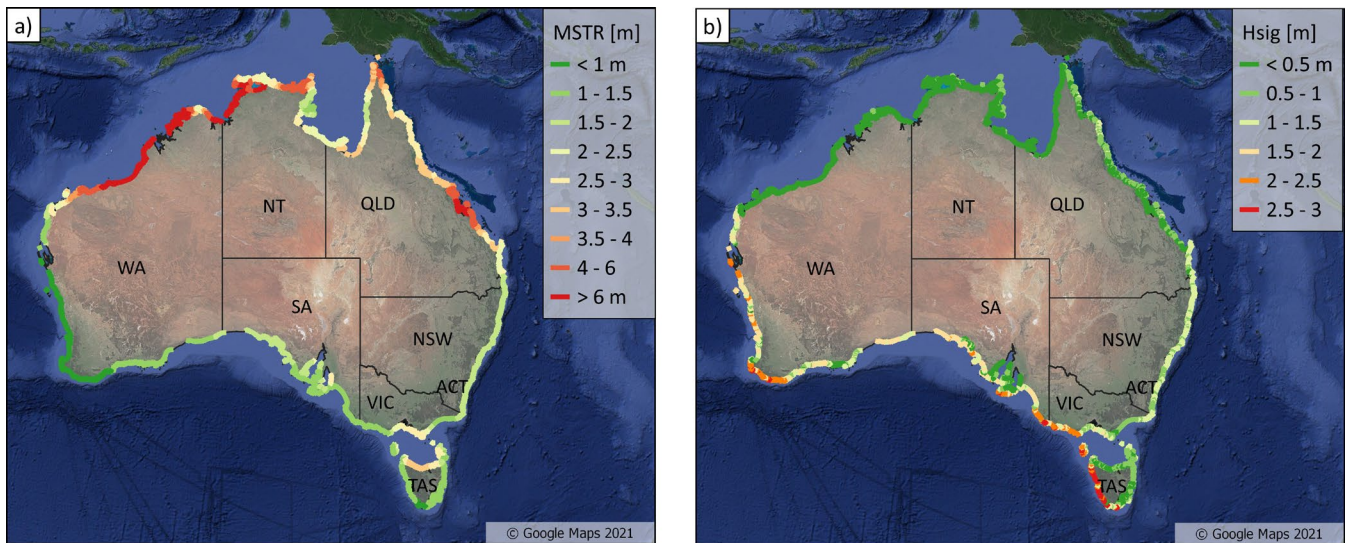

**Figure S1.** a) Mean Spring Tide Range (MSTR) around Australia from FES2014 Global tide model (Carrere et al., 2016). b) Median deep-water Significant Wave Height (Hs) around Australia from CAWCR Wave Hindcast (Smith et al., 2021).

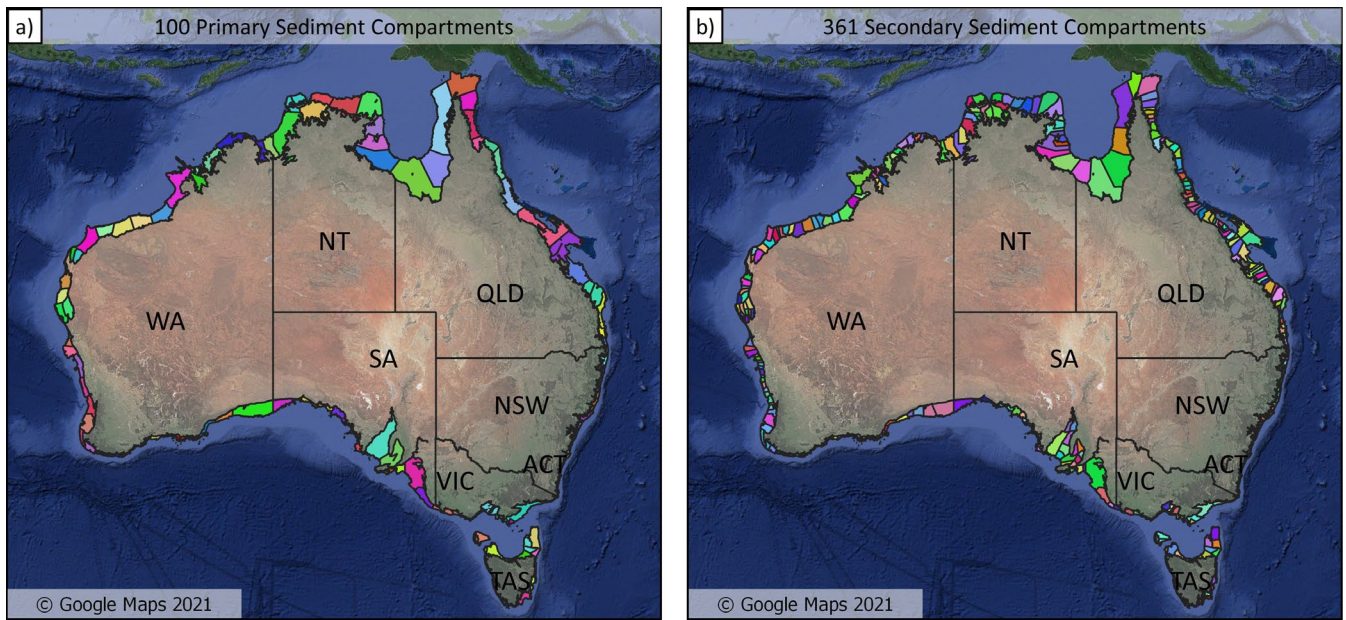

**Figure S2.** a) 100 primary sediment compartments and b) 361 secondary sediment compartments, as defined in the National Sediment Compartment Framework (Thom et al., 2018).

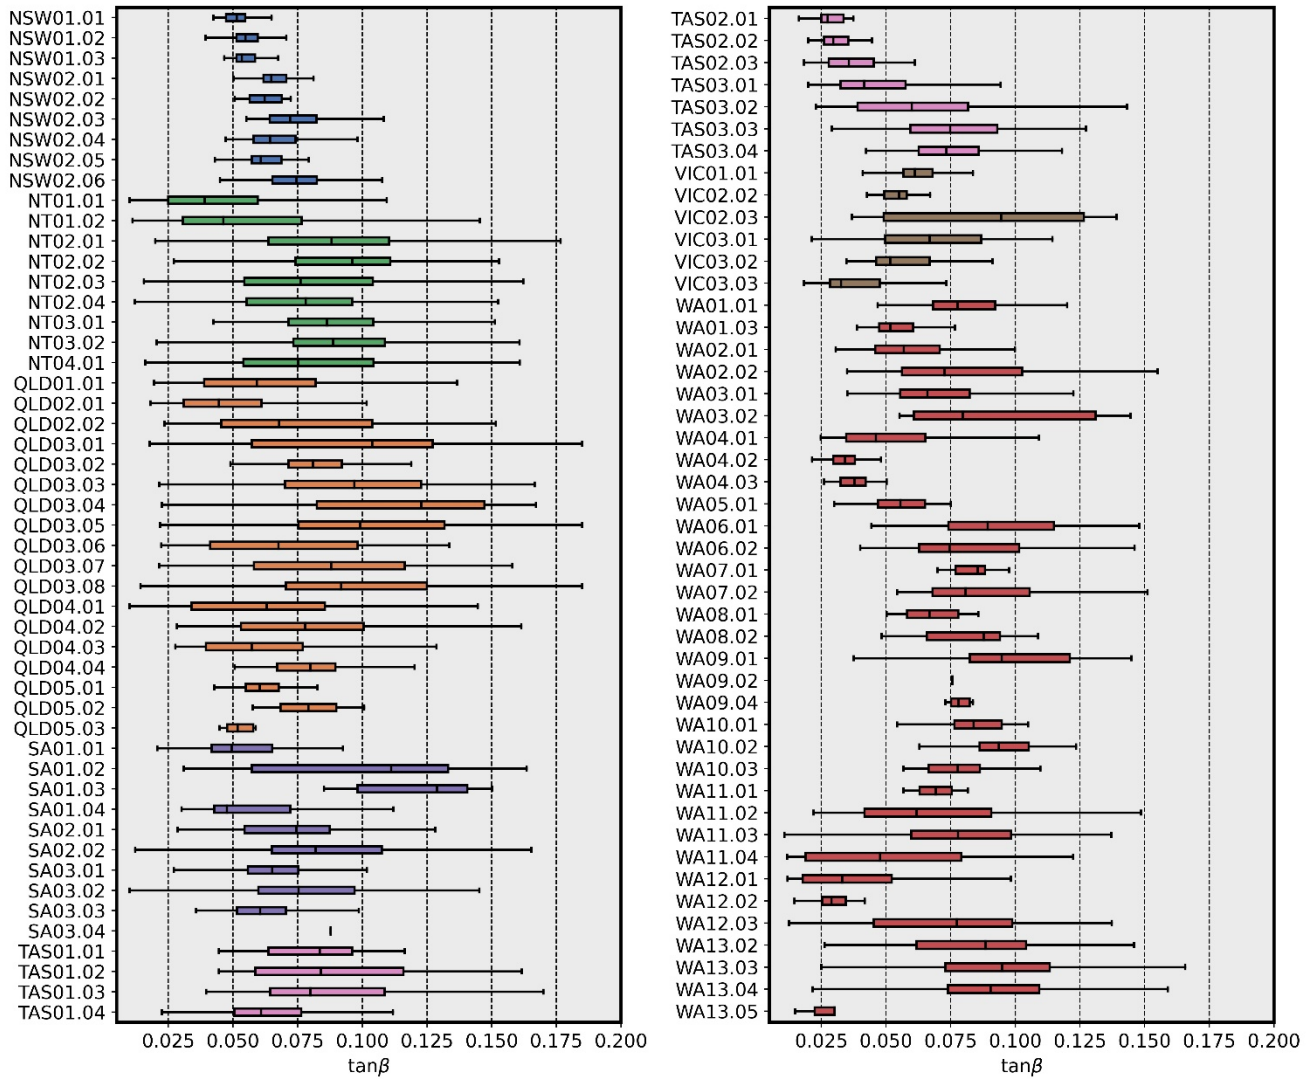

**Figure S3.** Distribution of beach-face slopes across the 100 primary sediment compartments as defined in the National Sediment Compartment Framework (Thom et al., 2018). The spatial extent of each compartment can be found with the corresponding IDs in the primary sediment compartment geospatial layer included in this dataset.



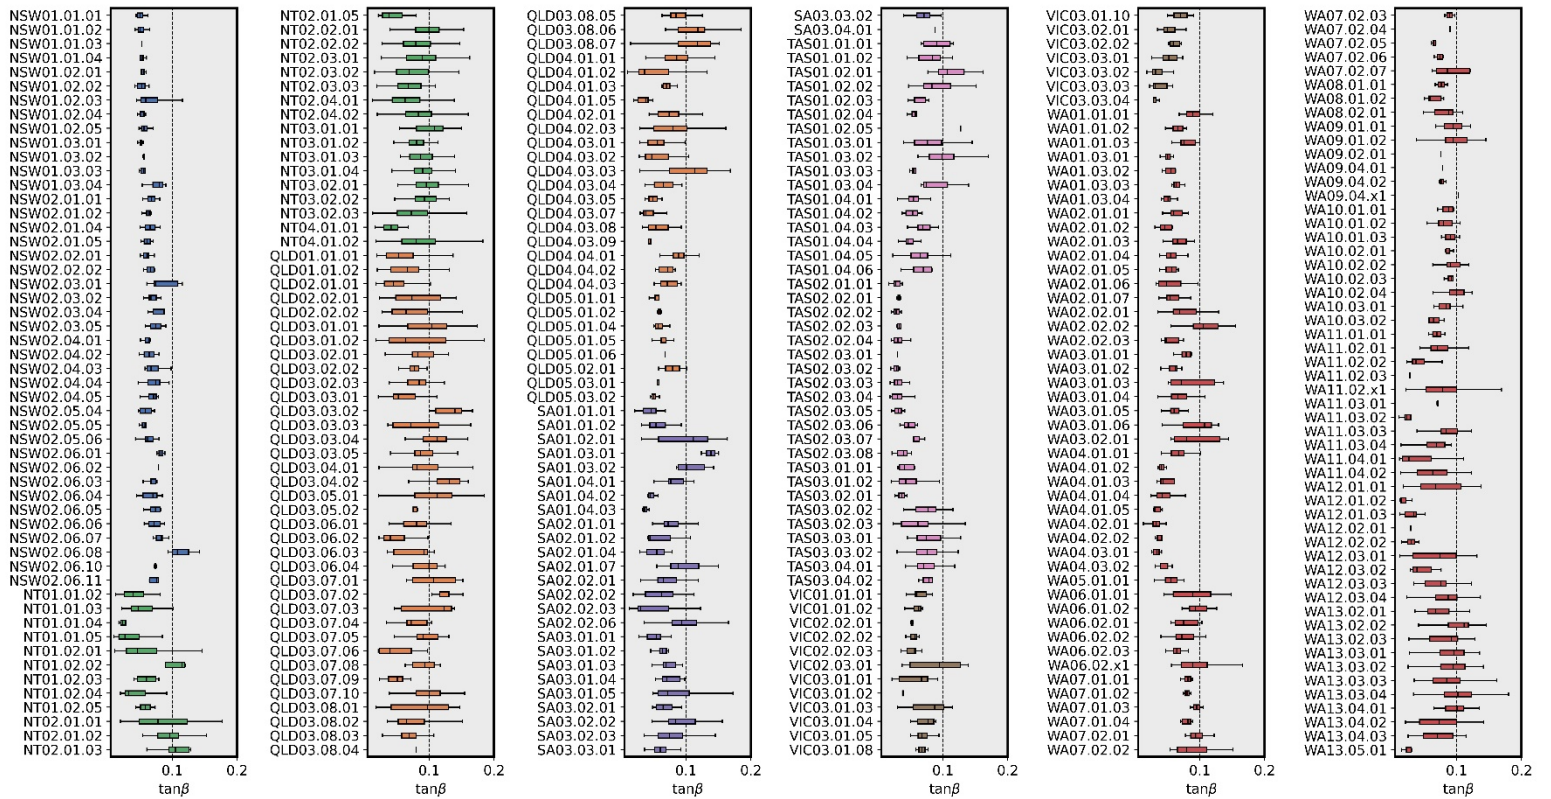

**Figure S4.** Distribution of beach-face slopes across the 361 secondary sediment compartments as defined in the National Sediment Compartment Framework (Thom et al., 2018). The spatial extent of each compartment can be found with the corresponding IDs in the primary sediment compartment geospatial layer included in this dataset.
